# Supplementary material for: Analysis of TBC1D4 in patients with severe insulin resistance
Source: Springer Nature journal article supplement (doi:10.1007/s00125-010-1724-x), 2010-03-26

### Electronic supplementary material

**ESM Fig. 1** GLUT4 translocation in transiently transfected 3T3L1 cells. The relative amount of GLUT4 at the cell surface in 3T3L1 adipocytes was assayed by electroporating cells with a plasmid for expression of HA-GLUT4-GFP and measuring the HA-GLUT4-GFP at the cell surface by quantitative single-cell immunofluorescence, as previously described [4]. In this method, HA-GLUT4-GFP at the cell surface is labelled with anti-HA and Cy3-conjugated secondary antibody; the fluorescence intensities for Cy3 and GFP in individual cells are determined and the relative amount of HA-GLUT4-GFP at the cell surface is expressed as the ratio of Cy3 to GFP, in order to correct for different levels of expression of the HA-GLUT4-GFP protein. Cy3, cyanine 3; GFP, green fluorescence protein; HA, haemagglutinin epitope; WT, wild type

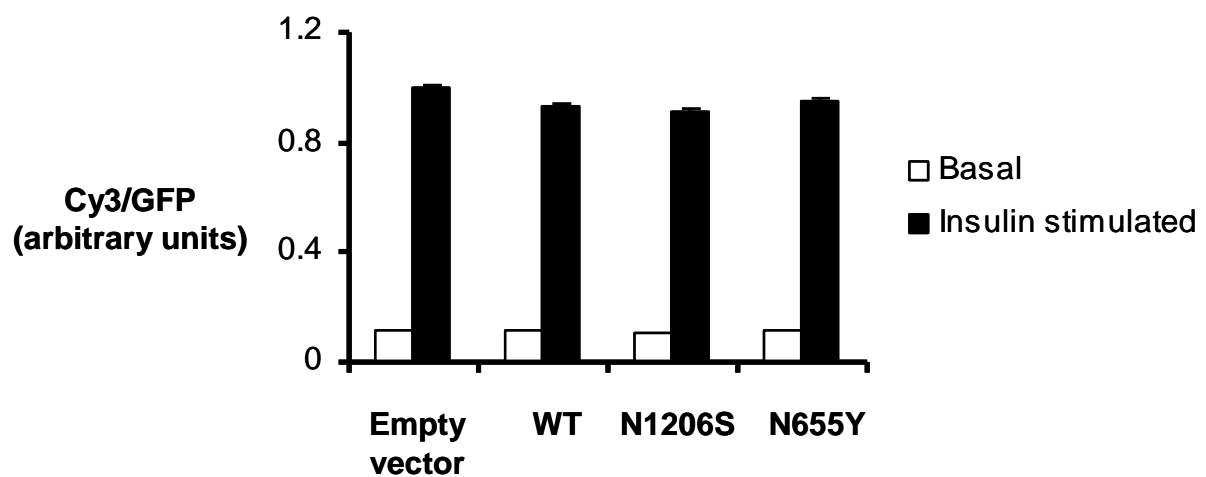

Supplement: MOESM1 [file 8089134]
