# Supplementary material for: Analysis of TBC1D4 in patients with severe insulin resistance
Source: Springer Nature journal article supplement (doi:10.1007/s00125-010-1724-x), 2010-03-26
Supplement: MOESM2 [file 8089134]

## Electronic supplementary material

**ESM Table 1** Phenotypic data from non-diabetic probands and accessible relatives of patients with the N1206S, N655Y and N785K *TBC1D4* variants

| Characteristic                   | Genotype |                                             |        |                                             |         |                                             |        |                                             |         |                                             |
|----------------------------------|----------|---------------------------------------------|--------|---------------------------------------------|---------|---------------------------------------------|--------|---------------------------------------------|---------|---------------------------------------------|
|                                  | N1206S   |                                             |        |                                             | N655Y   |                                             |        |                                             | N785K   |                                             |
|                                  | Proband  | Reference range/mean (95% CI <sup>a</sup> ) | Mother | Reference range/mean (95% CI <sup>a</sup> ) | Proband | Reference range/mean (95% CI <sup>a</sup> ) | Mother | Reference range/mean (95% CI <sup>a</sup> ) | Proband | Reference range/mean (95% CI <sup>a</sup> ) |
| Age (years)                      | 16       |                                             | 47     |                                             | 21      |                                             | 49     |                                             | 16      |                                             |
| Sex                              | F        |                                             | F      |                                             | F       |                                             | F      |                                             | F       |                                             |
| BMI (kg/m <sup>2</sup> )         | 28.5     |                                             | 25     |                                             | 45      |                                             | 34     |                                             | 33.5    |                                             |
| BMI SD score                     | +2.1     |                                             | +1     |                                             | +3.9    |                                             | +2.7   |                                             | +2.9    |                                             |
| Fasting insulin (pmol/l)         | 58       | 55 (52–59)                                  | 48     | 55 (52–59)                                  | 231     | 101 (66–137)                                | 55     | 72 (65–78)                                  | 212     | 72 (65–78)                                  |
| Peak insulin (pmol/l)            | 5,220    | 415 (389–414)                               | 506    | 415 (389–414)                               | 1680    | 730 (392–1070)                              | 717    | 532 (474–590)                               | 2463    | 532 (474–590)                               |
| Ratio of peak to fasting insulin | 90       | 8.5 (7.9–9)                                 | 10.5   | 8.5 (7.9–9)                                 | 7.3     | 7.3 (5–9.7)                                 | 13     | 8 (7.3–8.7)                                 | 11.6    | 8 (7.3–8.7)                                 |
| Fasting glucose (mmol/l)         | 4.9      | 4.9 (4.9–5.0)                               | 4.3    | 4.9 (4.9–5.0)                               | 3.4     | 5.2 (4.8–5.6)                               | 5      | 5 (4.9–5.1)                                 | 5.9     | 5 (4.9–5.1)                                 |
| Peak glucose (mmol/l)            | 10.2     | 7.5 (7.3–7.8)                               | 8      | 7.5 (7.3–7.8)                               | 8       | 8.2 (6.5–10)                                | 9.8    | 8.1 (7.7–8.5)                               | 4.0     | 8.1 (7.7–8.5)                               |
| Cholesterol (mmol/l)             | 5.4      | <5                                          | 4.3    | <5                                          | 3.6     | <5                                          | 6.7    | <5                                          | –       | –                                           |
| HDL (mmol/l)                     | 1.65     | <1                                          | 1.28   | <1                                          | 0.96    | <1                                          | 1.04   | <1                                          | –       | –                                           |
| Triacylglycerol (mmol/l)         | 2.9      | <3                                          | 1.06   | <3                                          | 1.2     | <3                                          | 1.6    | <3                                          | –       | –                                           |

<sup>a</sup>Data derived from OGTT data from BMI- and sex-matched controls from the Ely study [6]

BMI range 25–30 kg/m<sup>2</sup> (*n*=337), 30–35 kg/m<sup>2</sup> (*n*=126), ≥45 kg/m<sup>2</sup> (*n*=13)

F, female; M, male
